# Supplementary material for: Whole genome sequence and comparative analysis of Borrelia burgdorferi MM1
Source: PubMed Central journal article supplement (PMC5995427; doi:10.1371/journal.pone.0198135), 2018-06-11
Supplement: pone.0198135.s001.pdf [file pone.0198135.s001.pdf]

# Supplemental Figure 1

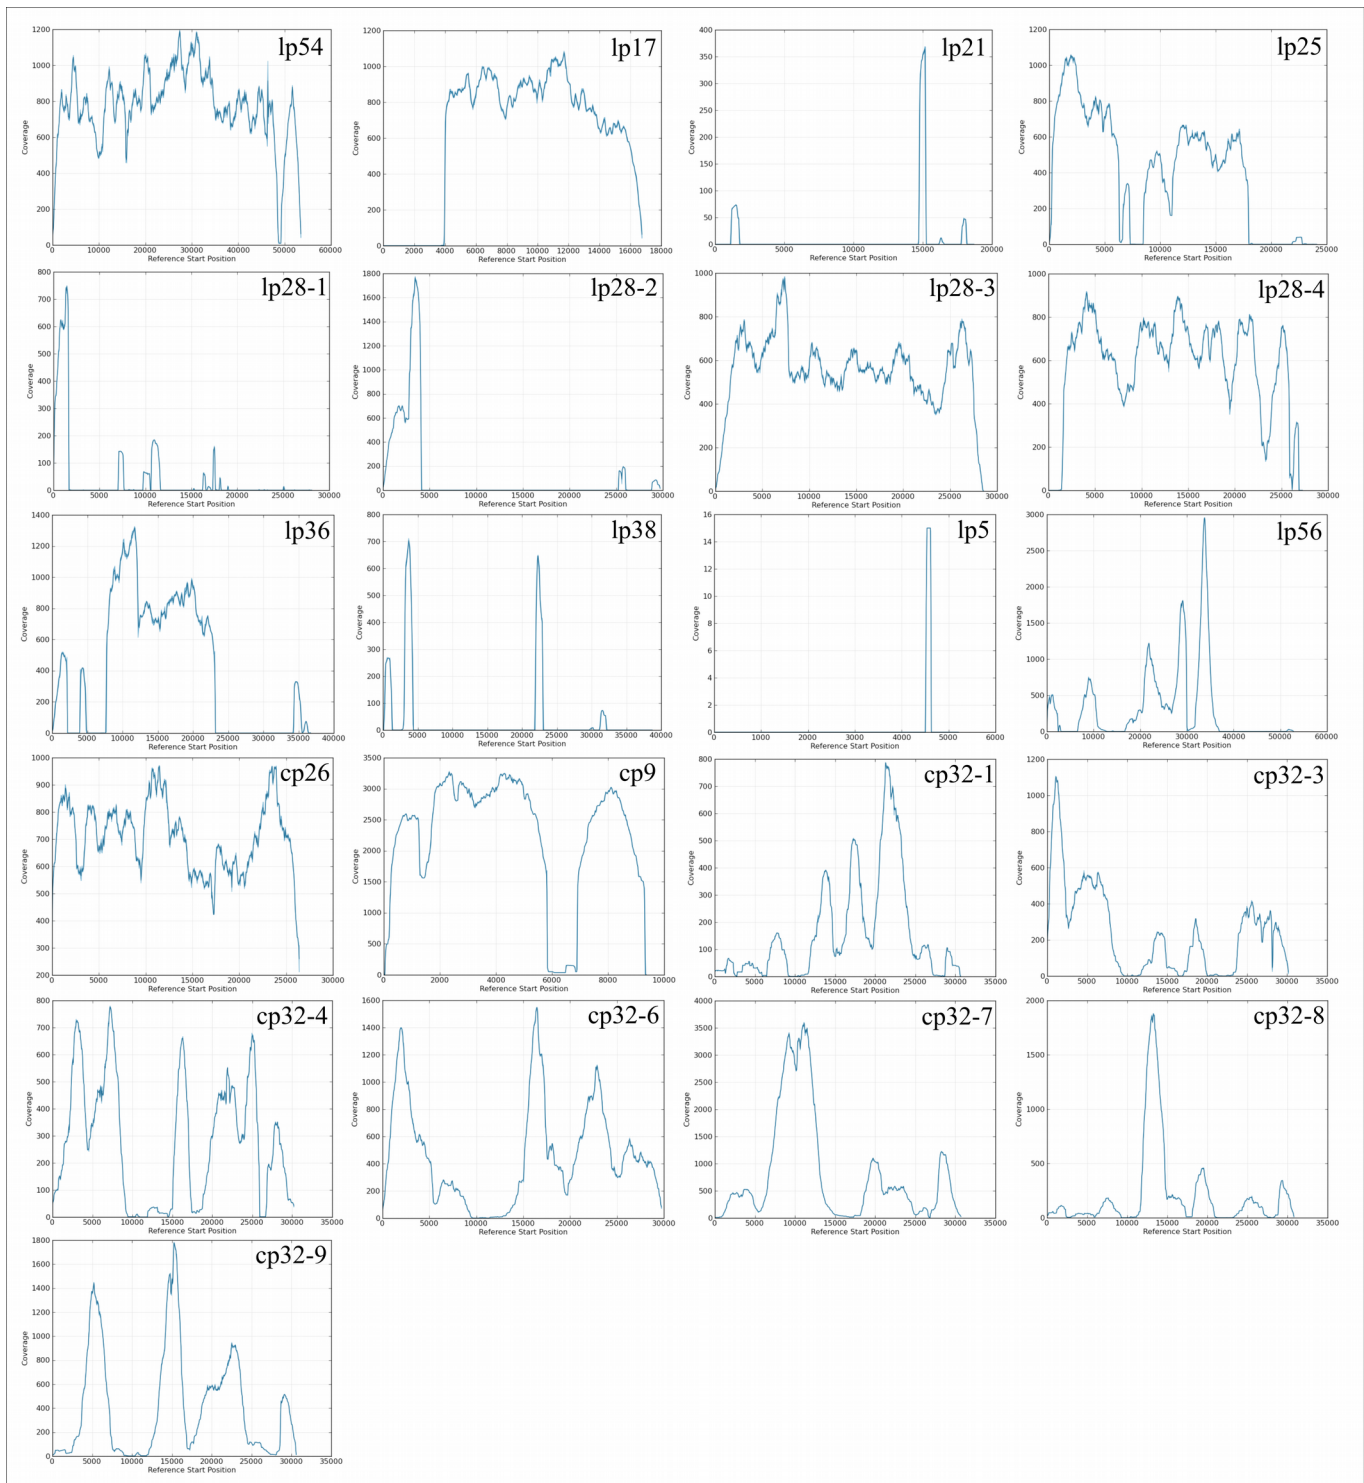

**Coverage of MM1 Sequence Reads Across *B. burgdorferi* B31 Plasmids.** An initial mapping of MM1 reads to the type strain B31 suggested lack of plasmids lp21, lp28-1, lp28-2, lp38, lp56 and lp5 in MM1 genome, while the presence/absence status of other plasmids in MM1 remained ambiguous. B31 plasmids are shown in each plot with X-axis and Y-axis representing Reference Start Position and Coverage respectively.
