# Supplementary material for: Whole genome sequence and comparative analysis of Borrelia burgdorferi MM1
Source: PubMed Central journal article supplement (PMC5995427; doi:10.1371/journal.pone.0198135), 2018-06-11

**A)**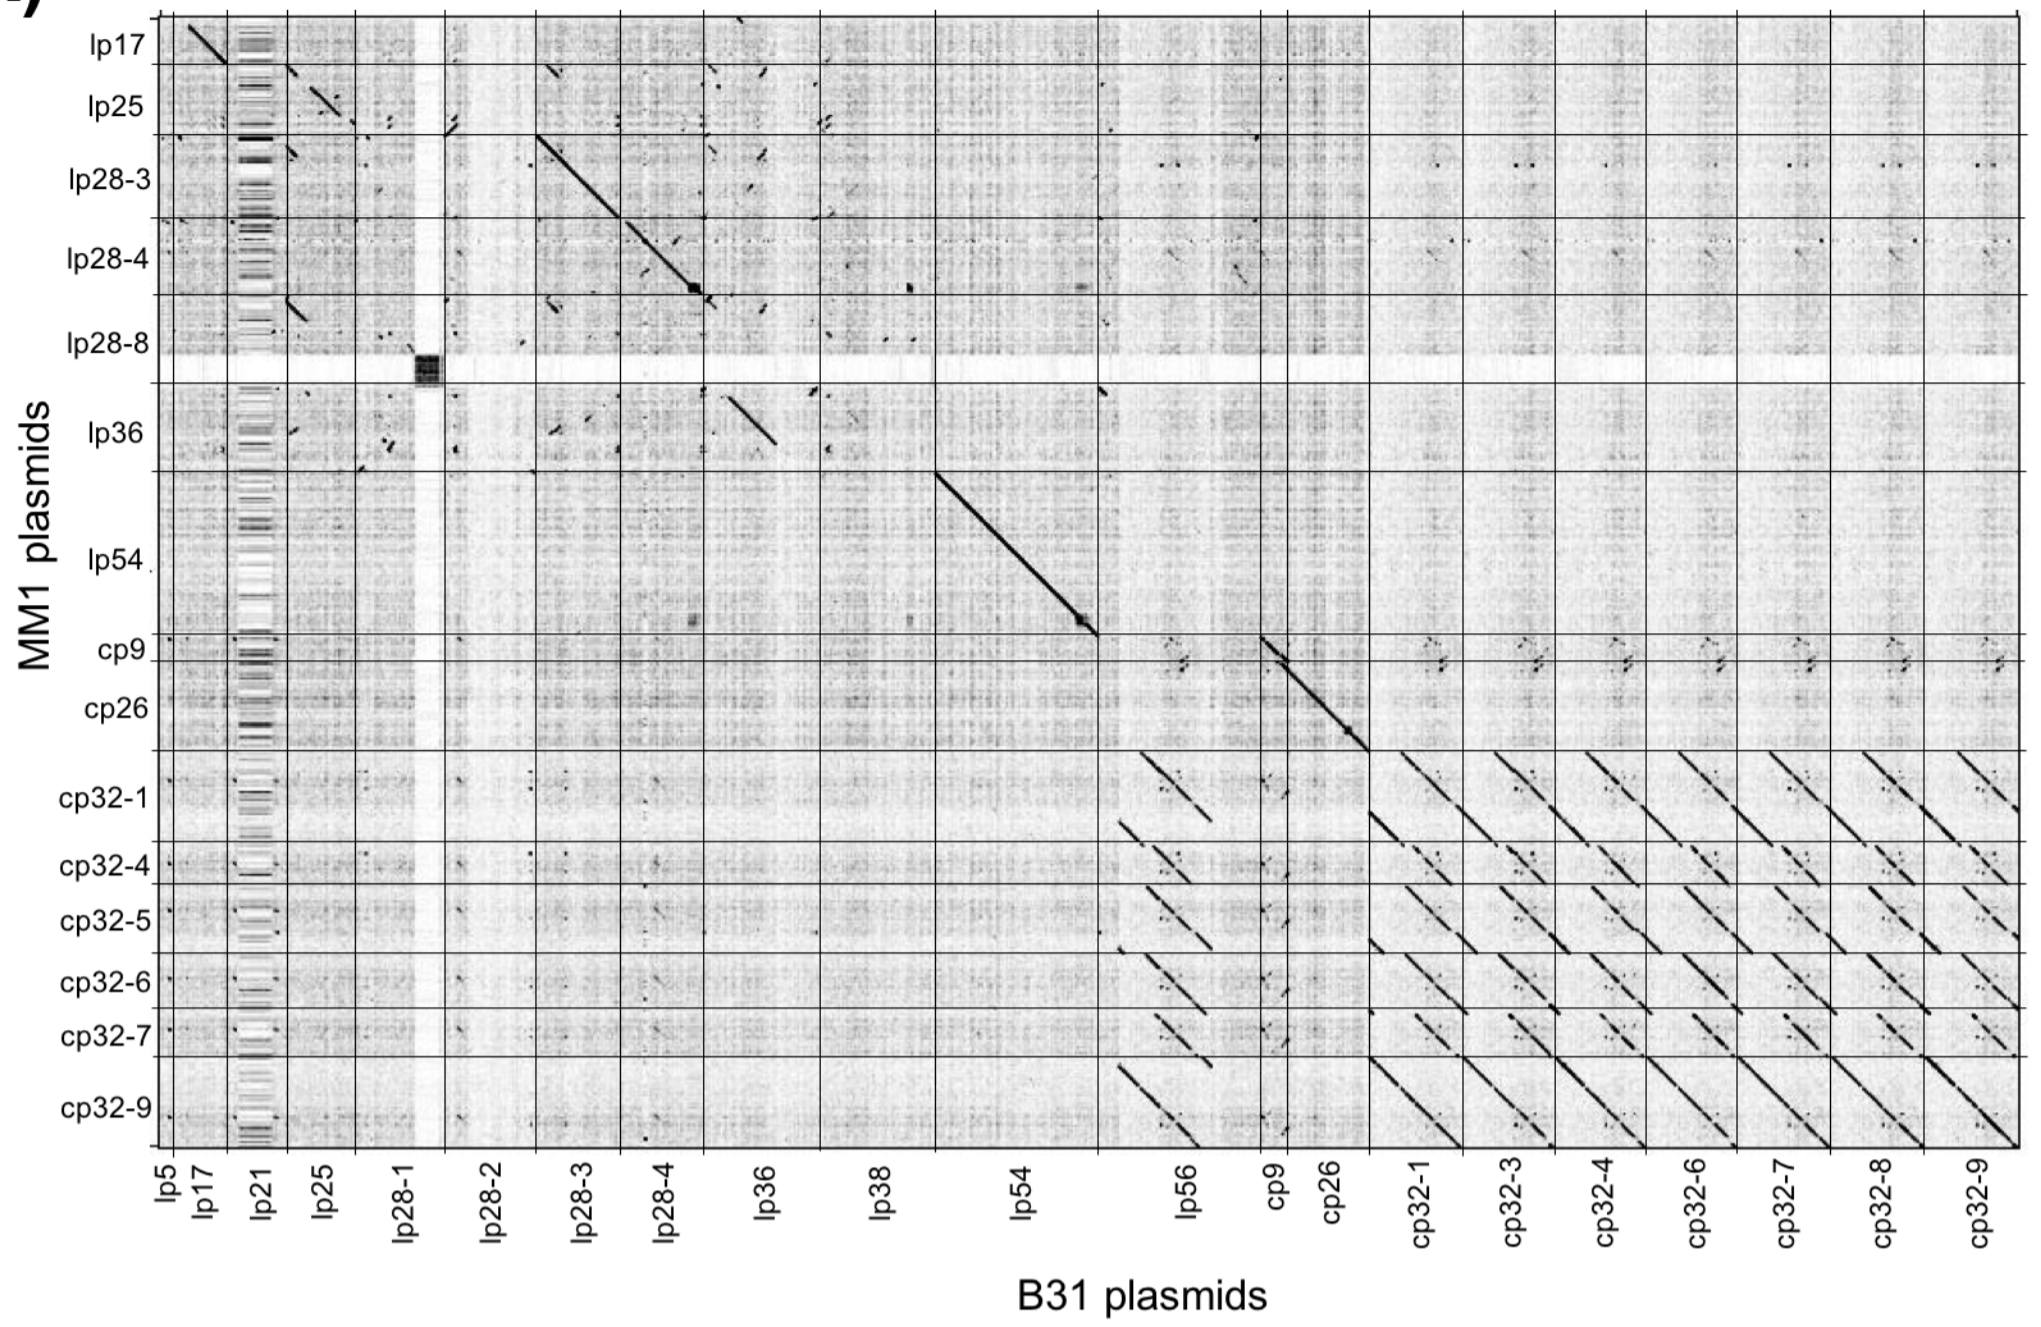**B)**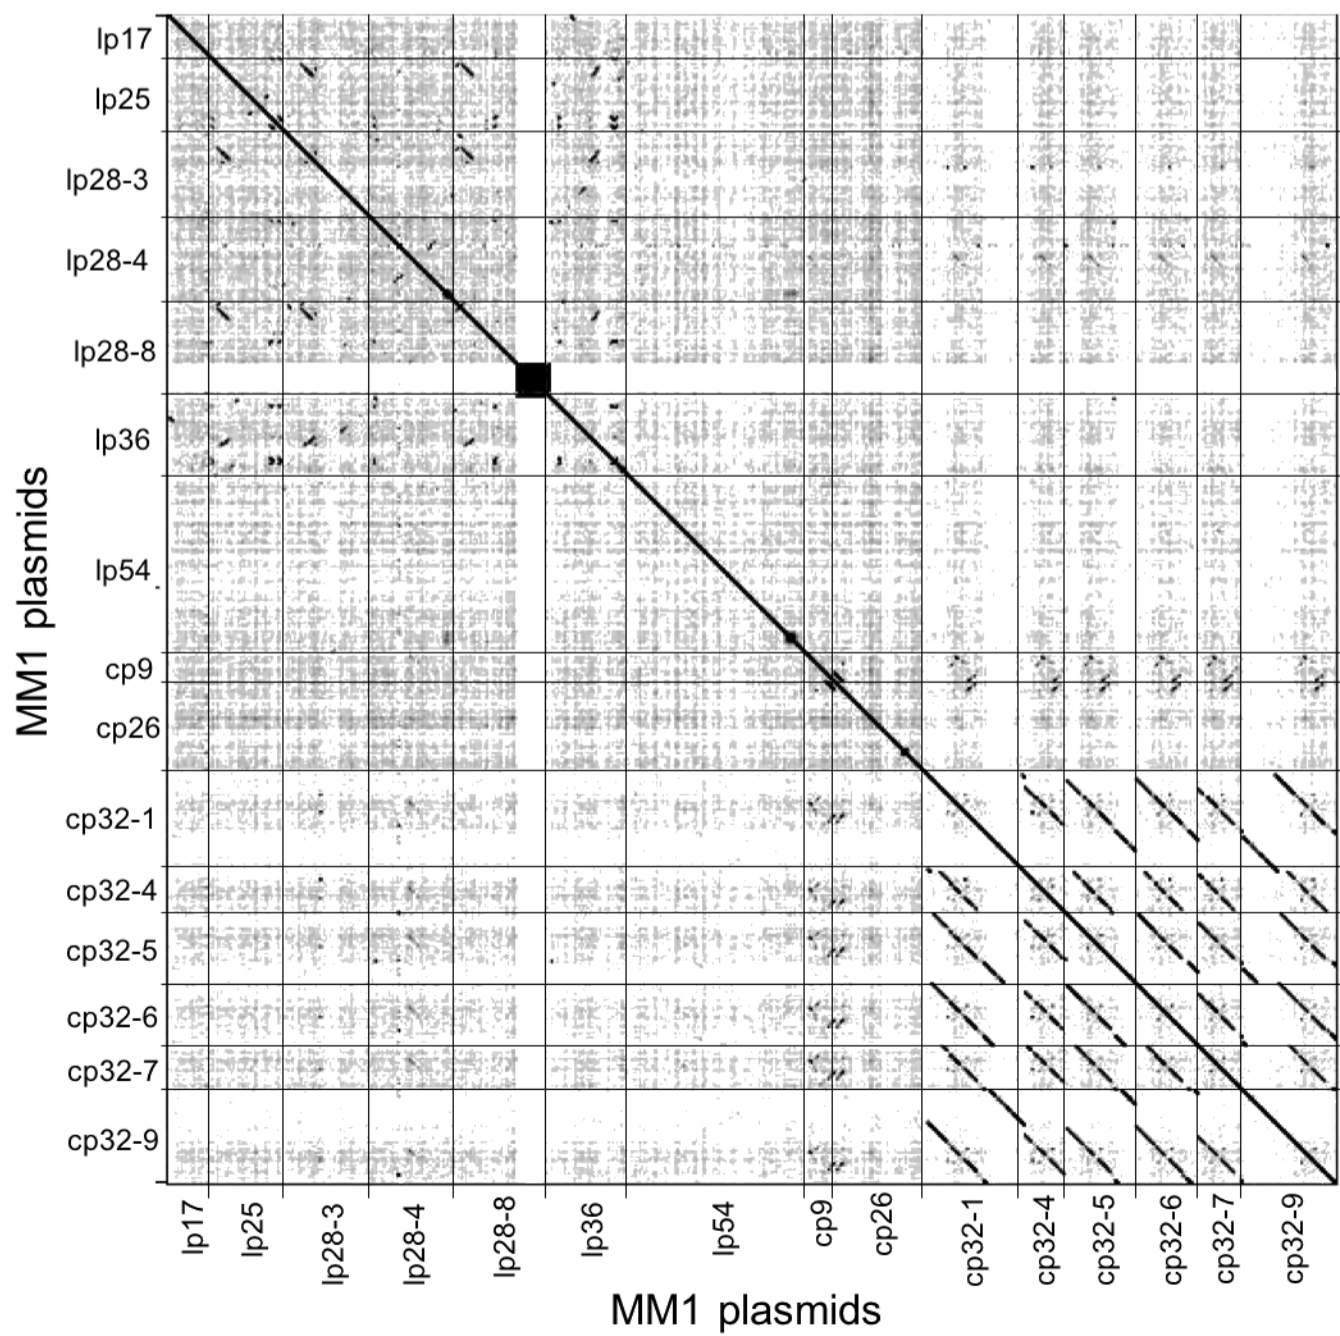

Supplement: pone.0198135.s002.pdf [file pone.0198135.s002.pdf]
