# Supplementary material for: Whole genome sequence and comparative analysis of Borrelia burgdorferi MM1
Source: PubMed Central journal article supplement (PMC5995427; doi:10.1371/journal.pone.0198135), 2018-06-11
Supplement: pone.0198135.s003.pdf [file pone.0198135.s003.pdf]

## Supplemental Figure 3

| Name                      | Sequence                                                                     |
|---------------------------|------------------------------------------------------------------------------|
| <i>MLST_nifS-12</i>       | AAAATAGAAAAACAAGAGAACTTGTA AAAAATTT <b>C</b> ATTAATGCAGAATCTGCAAAAAAT        |
| <i>Assembled_MM1_nifS</i> | AAAATAGAAAAACAAGAGAACTTGTA AAAAATTT <b>T</b> ATTAATGCAGAATCTGCAAAAAAT        |
| 05e484a1-7b54-48fb        | AAATAGAAAAACAAGAGAAC ---- TTGTA AAAATTT <b>T</b> TATTAAT-GAATCTGCAA--AT      |
| 2e08a83a-bc8f-4976        | AAACCGAAAAACA ---- AGAGA ACTTATA AAAATTT <b>T</b> ATTAATGCAGAATCTGCAAAAATAT  |
| 88624a5a-f257-4af9        | AAAGCCGAAAAACAAGA -- GAAC -- TTGTA AAAATTT <b>T</b> ATTAATGCAGAATCTGCA-AATAT |
| ebeaba4b-a7f2-4c91        | AAATAGAAAAACAAGAGAAC ---- TTGTA AAAATTT <b>T</b> ATTAATGCAGA ACTCTGCAAAAATA  |
| a753454d-707d-4b83        | AAATAGAAAAACAAGGGGACT ---- GTAAATT -- <b>T</b> ATTAATGCAGAAT ----            |
| 2cdd8d93-15cd-449d        | CAAAATAGAGCTAAGAA ---- TTGACAATTT <b>T</b> GACTGCTTGGAGTCTGCAAAAATAA         |
| 5a187c5f-d9c6-40d1        | AAATAGAAAAACAAGAGAAC ---- TTAAAAATTT <b>T</b> ATTAATGTGCAGAATCTGCAAAA-       |
| c5dc593f-c1fa-40f8        | AAAGCGAAAAACAAGAGAAC ---- TTGAAAATTT <b>T</b> ATTAATGCAGAATCTGCAAAAATAT      |
| c3fed319-9ceb-4396        | AAATAGTAGAAAAACAGGGGACTTGTA AAAATTT <b>T</b> CTTAATGCAGAATCTGCAAAAATAT       |
| e7fb0bcb-85cb-4a2a        | AAAATAGAAAAACAAGAGAAC ---- TGCTAAATTT <b>T</b> ATTAATGCAGAATCTG-----         |
| 0177d47f-9cdd-4c4e        | AAATAGAAAAACAAGAGAAC ---- TTGTA AAGTT <b>T</b> ATTAATGCAGAATCTGCAAAA--       |

\*

| Name                      | Sequence                                                                 |
|---------------------------|--------------------------------------------------------------------------|
| <i>MLST_pepX-1</i>        | TACAATGCTCA <b>T</b> GACAATTTAACAC --- GTAATCAGTAGCACTAAAAAGCAATAAAAAGA  |
| <i>Assembled_MM1_pepX</i> | TACAATGCTCA <b>C</b> GACAATTTAACAC --- GTAATCAGTAGCACTAAAAAGCAATAAAAAGA  |
| 817a604f-2391-44b1        | ACAATGCGGCA <b>C</b> GACAATTTAACAC --- GTAATCAGTAGCACTAAAAGCAATAAAGATAA  |
| a216f821-fd7a-4ebb        | ATACATGCTCA <b>C</b> GACAATTTAACG --- ATGAAGATCAGCACTAAAAGCAATAAAGAT     |
| aa375ec3-643a-4f7e        | -TACAATTCAA <b>G</b> GACAATTTAACAC --- GTAATGAGTAGCACTAAAGCAATAAATAATA   |
| 26deeb2d-2462-48ce        | TACAATGCTCA <b>C</b> G-ACAATTTAACAC --- GCAATCAGTAGCACTAAAAGCAATAAAGATA  |
| D6a5329d-8245-4941        | -ACCAATTCAC <b>G</b> GACATTTGAATAGGTACGTATTAGTAGCACTAAAGCAATAGACAGATA    |
| 6e1fdff6-2933-419d        | TACAATGCTCA <b>C</b> GACAATTTAAA ---- TGATCAGTAGCACTAAAAGGGCAATAAAGAT    |
| cfa9c429-2b73-4daf        | TACAATGCTCA <b>C</b> GACAATTTAACAC --- GTAATGAGTAGCACTAAAAGCAATAAAGATA   |
| b4a50839-4edc-485b        | ACATCCTCTCA <b>C</b> GACAATTTAACAG --- TAAACCAGTAGCACTAAAAAGCAATAGAATA   |
| 64f1cd9f-45c5-47a7        | TACAATGCTCA <b>C</b> G-ACAATTTAACAC --- GTAATCAGTAGCACTAAA ACTAATAAAGATA |

\*

**Nanopore sequencing reads confirm the novel SNPs in *nifS* and *pepX*.** Top: The de novo assembly of the *nifS* gene matches the MLST *nifS* type 12 except for a C->T polymorphism. Eleven nanopore reads align to this region and all contain the T variant. Bottom: The de novo assembly of the *pepX* gene matches the MLST *pepX* type 1 except for a T->C polymorphism. Nine nanopore reads align to this region and eight contain the C variant. The two SNPs of interest are noted with a red asterisk (\*).
